# Supplementary material
Source: Springer Nature journal article supplement (https://www.springermedizin.de/resource/supplementary/12987_2010_440_MOESM4_ESM.pdf/9612008)

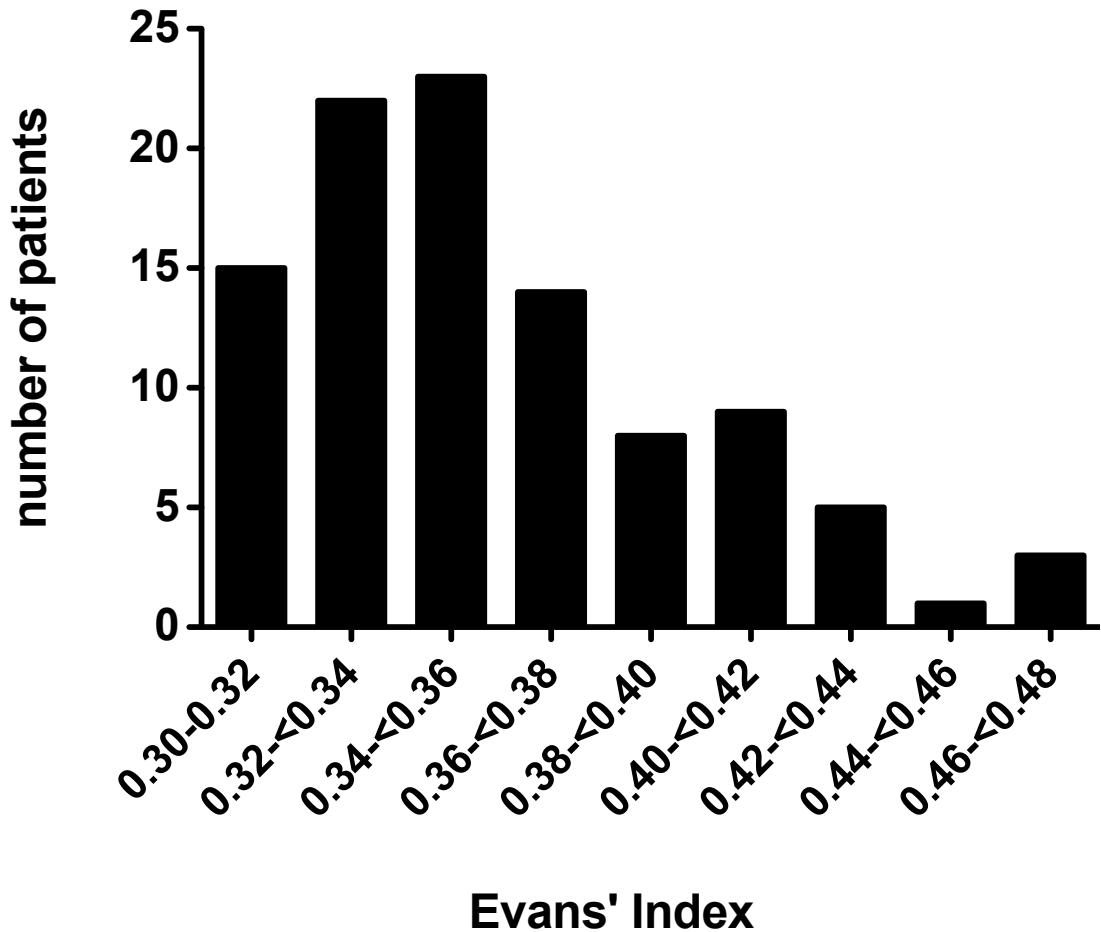

Supplement: MOESM4 [file 9612008]
